# Supplementary material for: Construction of covalent organic framework with unique double-ring pore for size-matching adsorption of uranium
Source: Royal Society of Chemistry journal article supplement (doi:10.1039/d0nr06854c), 2020-01-01
Supplement: d0nr06854c1.pdf [file d0nr06854c1.pdf]

Electronic Supplementary Information

**Construction of covalent organic framework with unique double-ring pore for  
size-matching adsorption of uranium**

Jie Zhang,<sup>ab</sup> Lihong Zhou,<sup>\*a</sup> Zhimin Jia,<sup>b</sup> Xiaofeng Li,<sup>b</sup> Yue Qi,<sup>b</sup> Chuting Yang,<sup>c</sup> Xinghua Guo,<sup>b</sup> Shanyong Chen,<sup>b</sup> Honghan Long,<sup>b</sup> Lijian Ma<sup>\*b</sup>

a. College of Environment and Ecology, Chengdu University of Technology, No.1, Dongsanlu, Erxianqiao, Chengdu 610059, P. R. China. E-mail: zhoulihong2012@cdut.edu.cn.

b. College of Chemistry, Sichuan University, Key Laboratory of Radiation Physics & Technology, Ministry of Education, No. 29 Wangjiang Road, Chengdu, 610064, P. R. China. E-mail: ma.lj@hotmail.com; Fax: +86 28 85412907; Tel: +86 28 85412329

c. Institute of Nuclear Physics and Chemistry, China Academy of Engineering Physics, Mianyang 621900, P. R. China.

\* Corresponding Authors: ma.lj@hotmail.com (L. Ma); zhoulihong2012@cdut.edu.cn (L. Zhou).

## Table of Content

|                                         |    |
|-----------------------------------------|----|
| 1. Supporting Experimental Section..... | 3  |
| 2. Supporting Figures and Tables.....   | 3  |
| 3. Supporting References.....           | 20 |

## Section S1. Synthesis of 1,3,5-triformylphloroglucinol (Tp)

Tp was synthesized following previously reported procedure.<sup>1</sup> Typically, phloroglucinol (6 g) and hexamethylenetetramine (15 g) in trifluoroacetic acid (75 mL) refluxed 2 h at 100 °C, and then added the HCl (3 M,150 mL) refluxed 1-1.5 h. The characterizations of Tp were shown in Fig. S1-S3, and it were matched well with the literature.

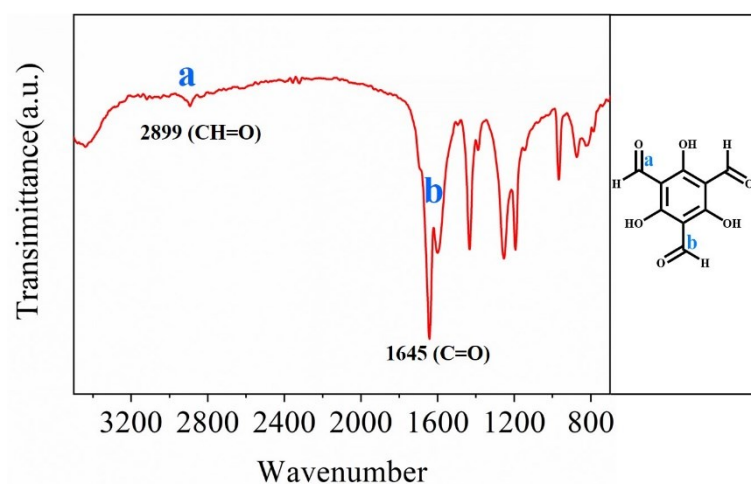

**Fig. S1.** FT-IR spectrum of Tp.

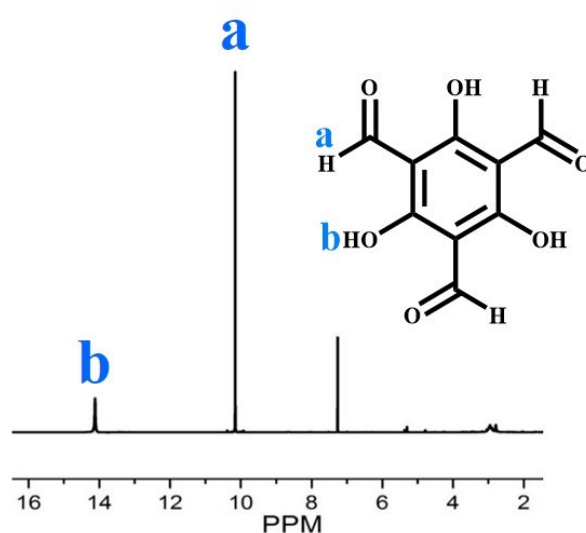

**Fig. S2.** <sup>1</sup>H NMR spectrum (CDCl<sub>3</sub>) of Tp.

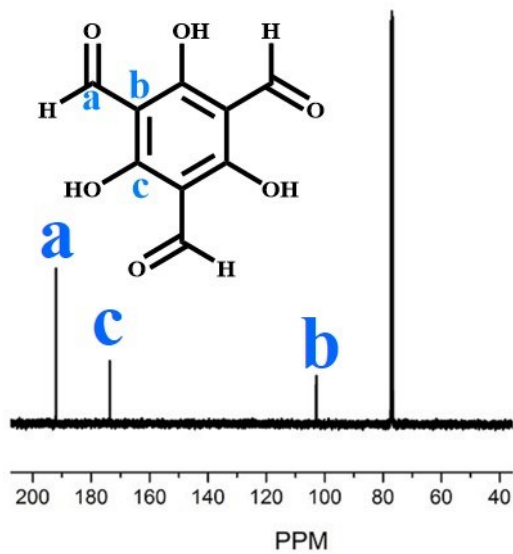

**Fig. S3.** <sup>13</sup>C NMR spectrum (CDCl<sub>3</sub>) of Tp.

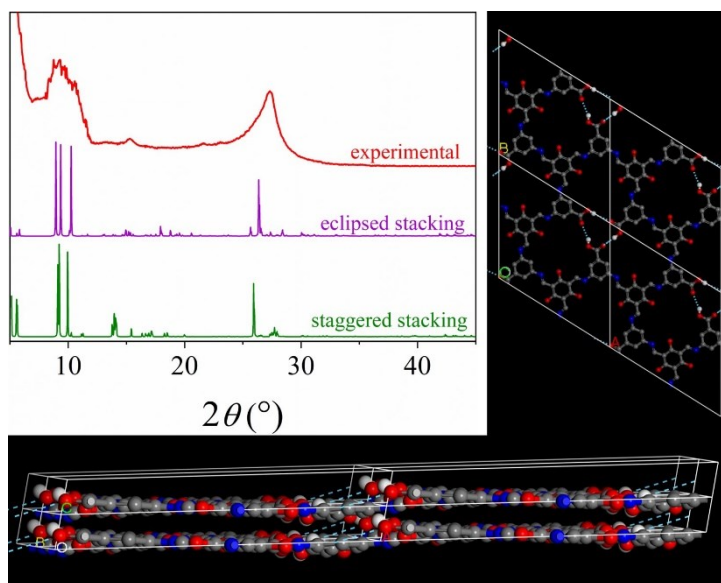

**Fig. S4** Experimental and simulated PXRD patterns of Dp-COF, and space filling models of Dp-COF with eclipsed stacking (C, gray; N, blue; O, red; H, white).

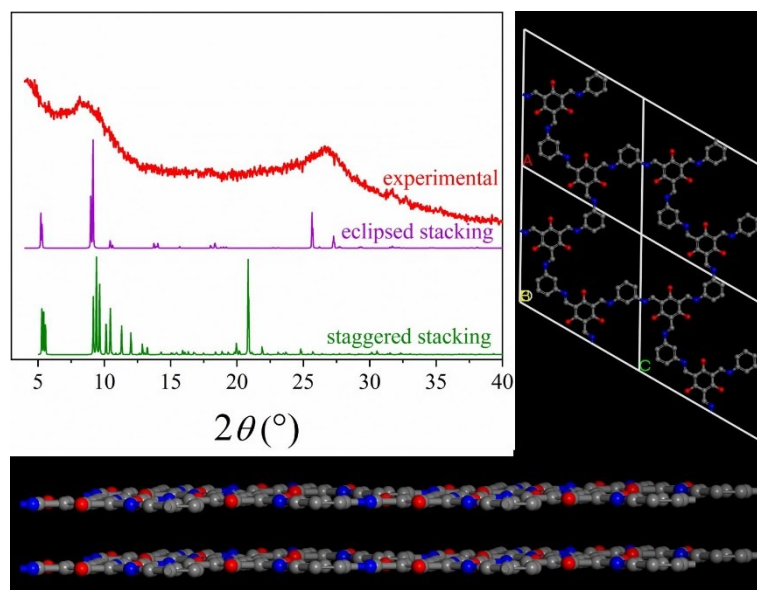

**Fig. S5** Experimental and simulated PXRD patterns of TpMa, and space filling models of TpMa with eclipsed stacking (C, gray; N, blue; O, red; H, white).

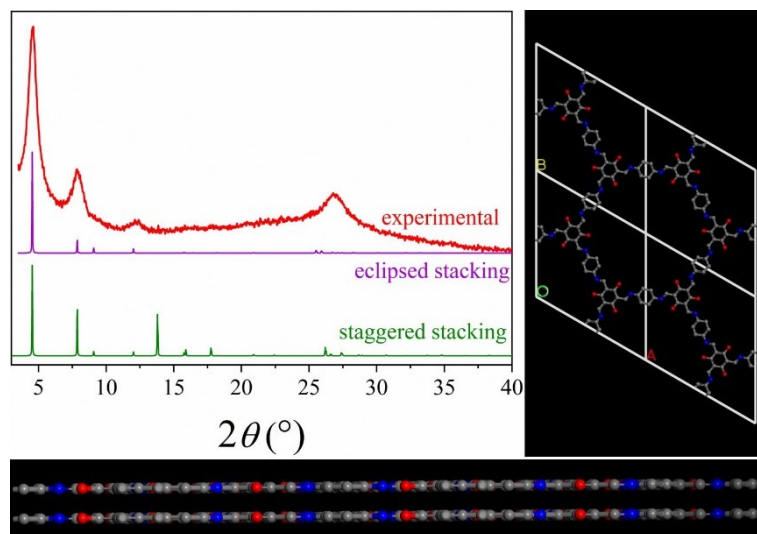

**Fig. S6** Experimental and simulated PXRD patterns of TpPa-1, and space filling models of TpPa-1 with eclipsed stacking (C, gray; N, blue; O, red; H, white).

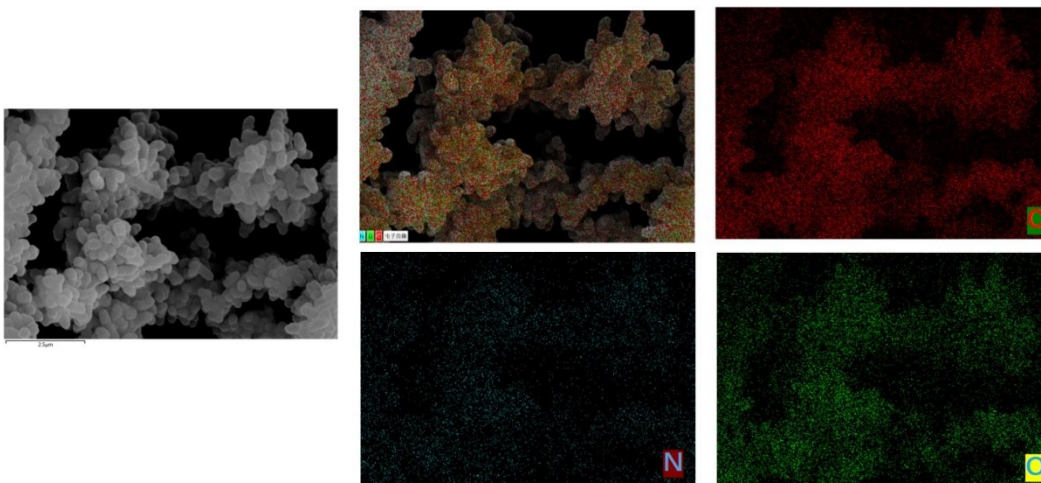

**Fig. S7** SEM mapping images of Dp-COF.

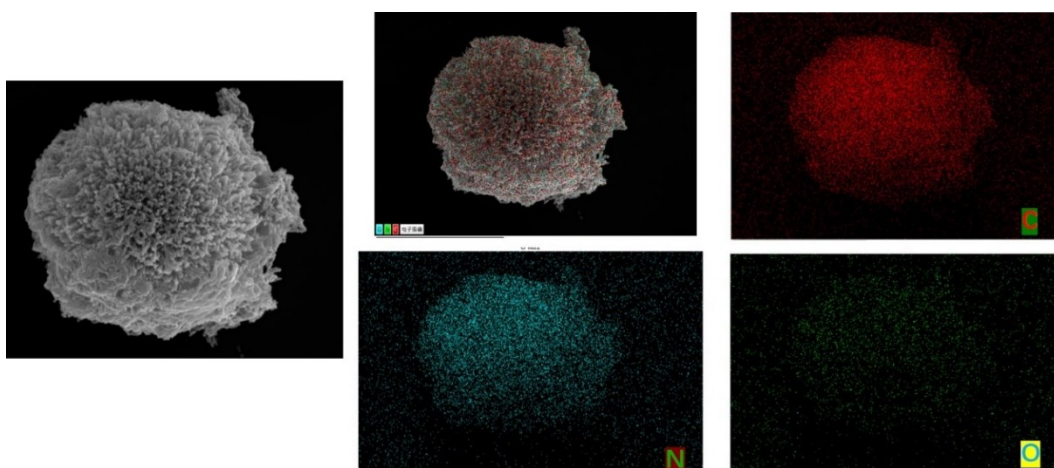

**Fig. S8** SEM mapping images of TpMa.

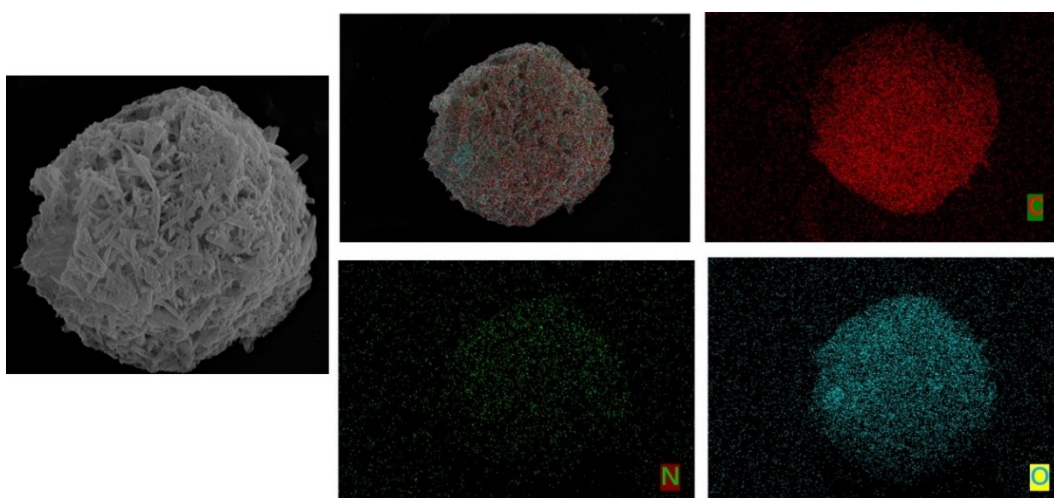

**Fig. S9** SEM mapping images of TpPa-1.

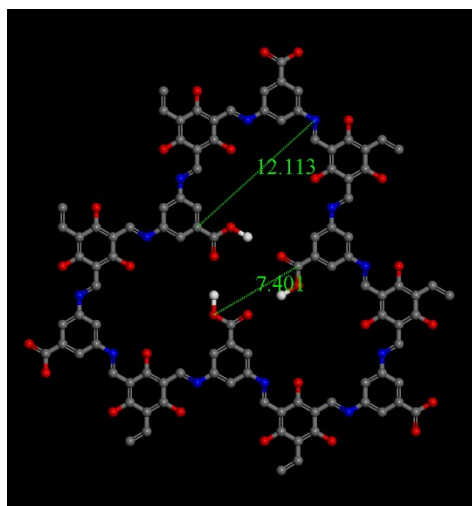

**Fig. S10** Simulated pore sizes of Dp-COF.

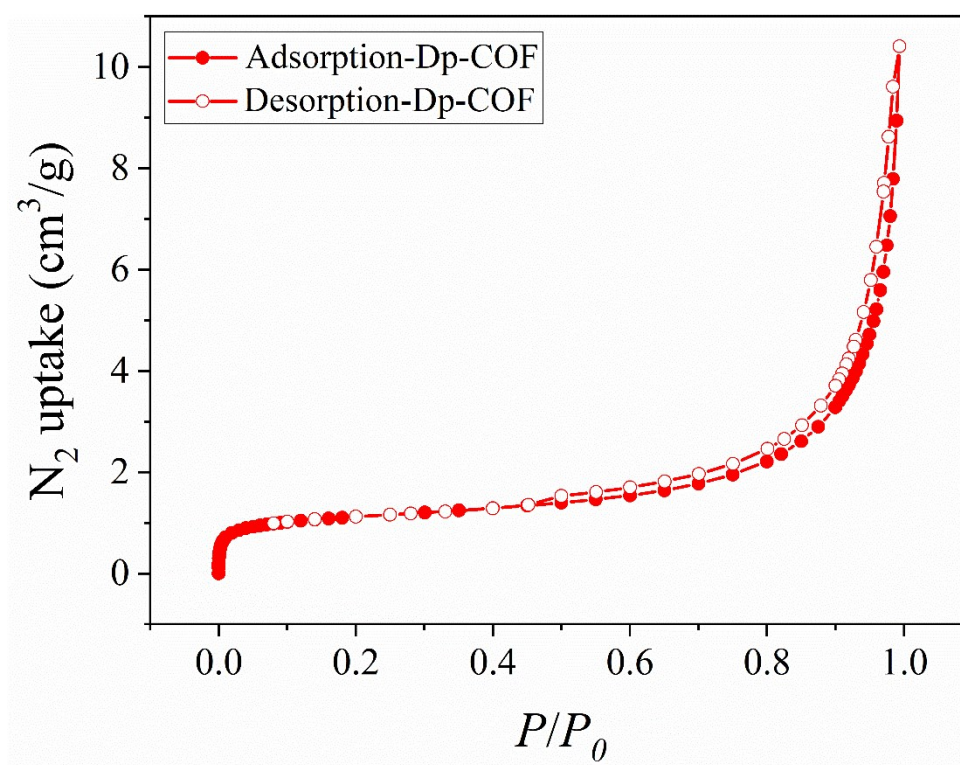

**Fig. S11**  $N_2$  adsorption–desorption isotherms of Dp-COF.

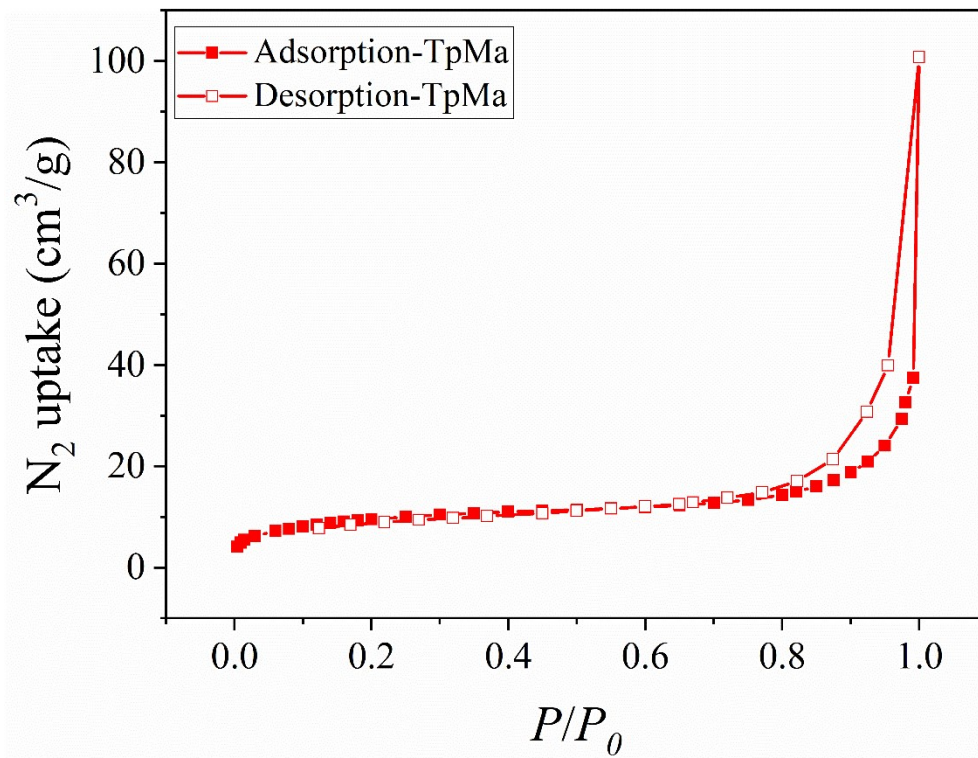

**Fig. S12**  $\text{N}_2$  adsorption–desorption isotherms of TpMa.

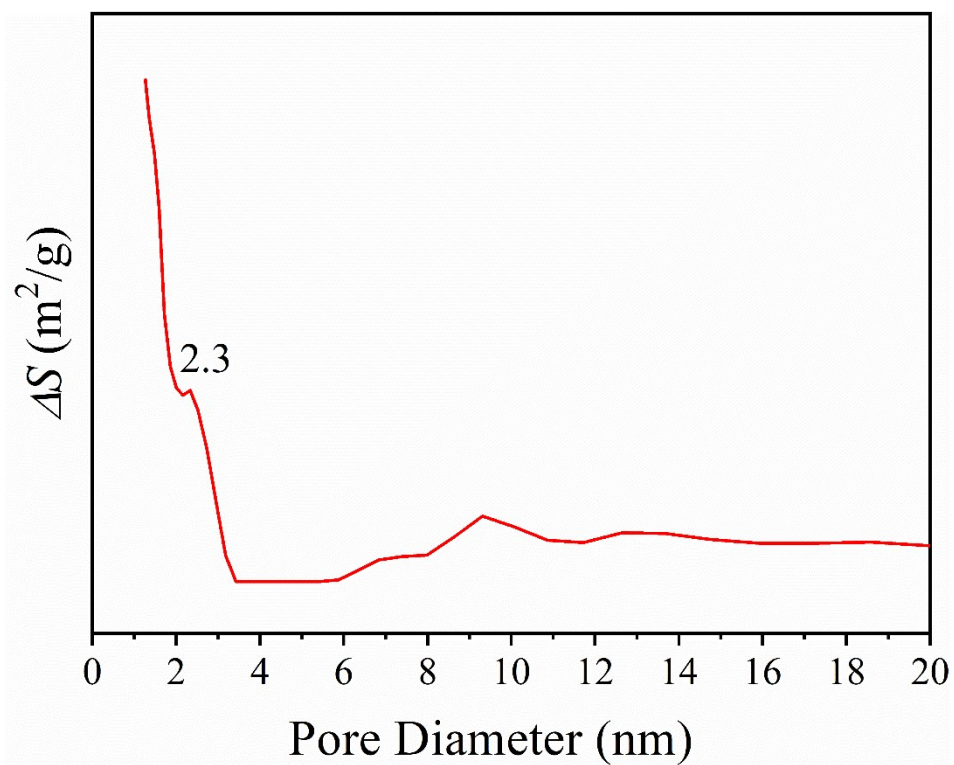

**Fig. S13** Pore-size distribution of TpMa.



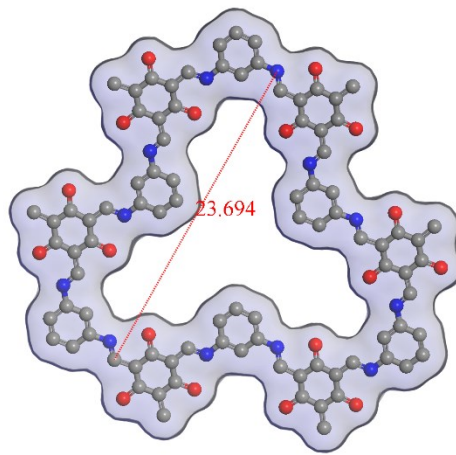

**Fig. S14** Simulated pore sizes of TpMa.

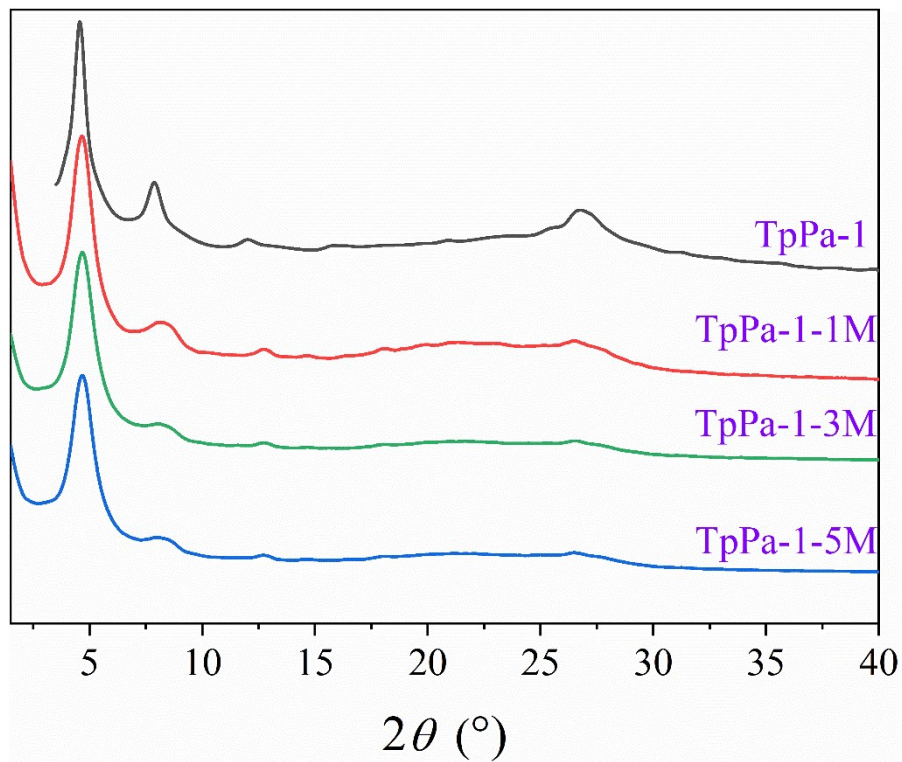

**Fig. S15** XRD of TpPa-1 before and after soaking in HNO<sub>3</sub> solutions.

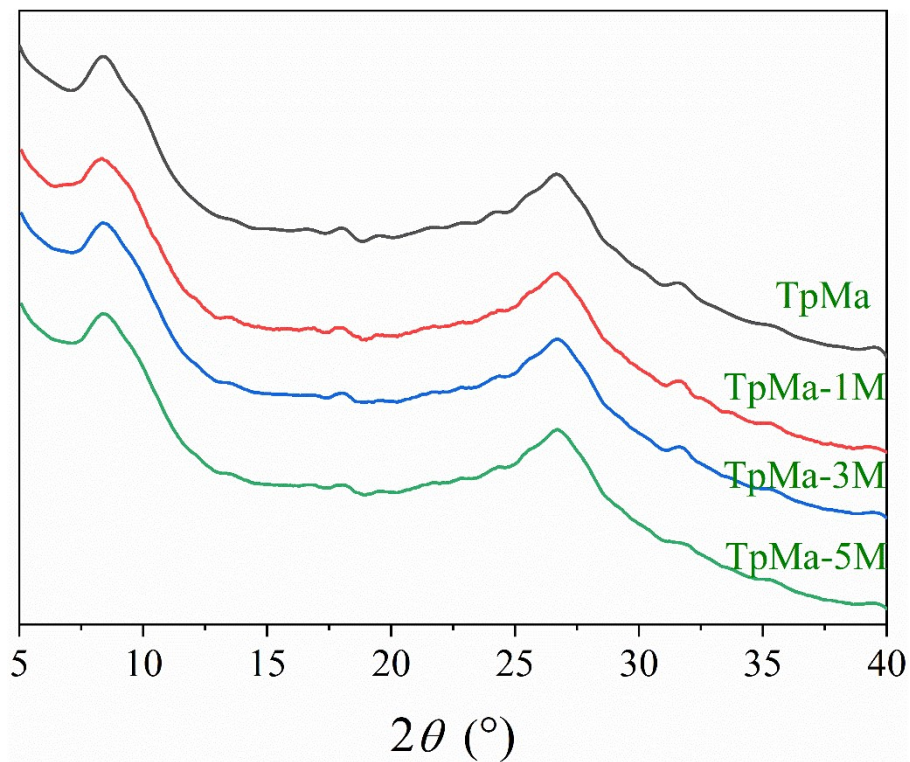

**Fig. S16** XRD of TpMa before and after soaking in  $\text{HNO}_3$  solutions.

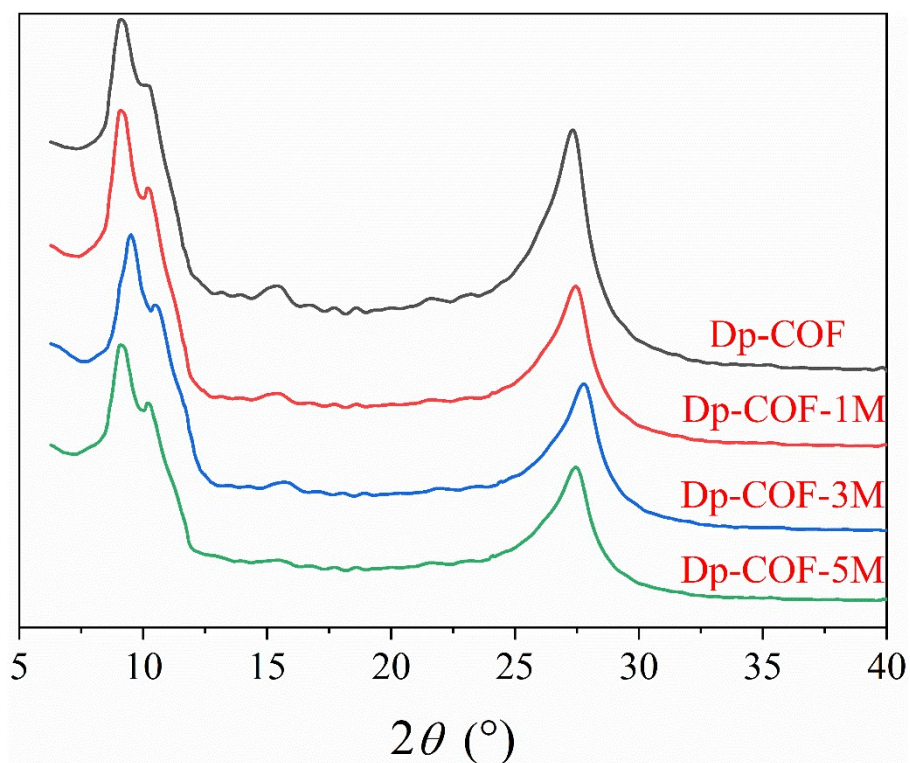

**Fig. S17** XRD of Dp-COF before and after soaking in  $\text{HNO}_3$  solutions.

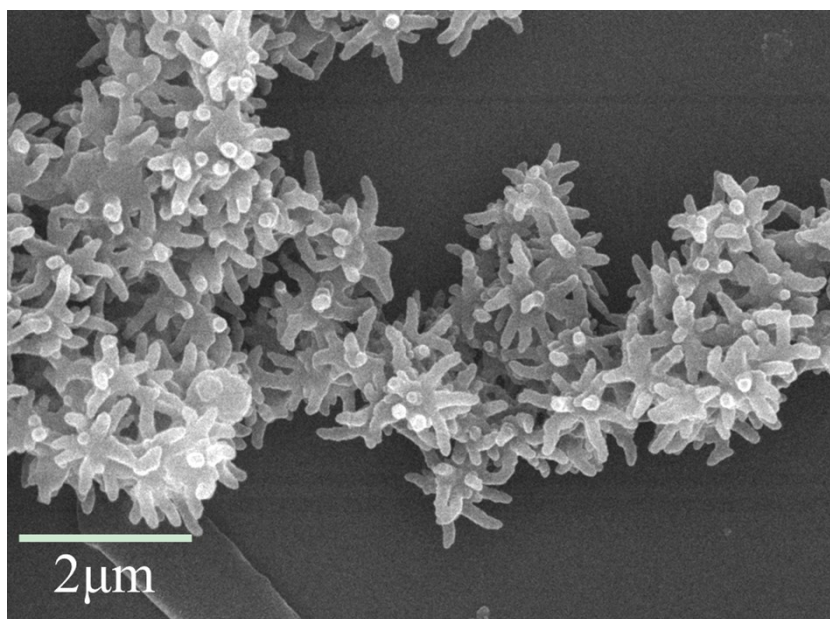

**Fig. S18** SEM image of TpPa-1 after soaking in 5 M HNO<sub>3</sub> solution.

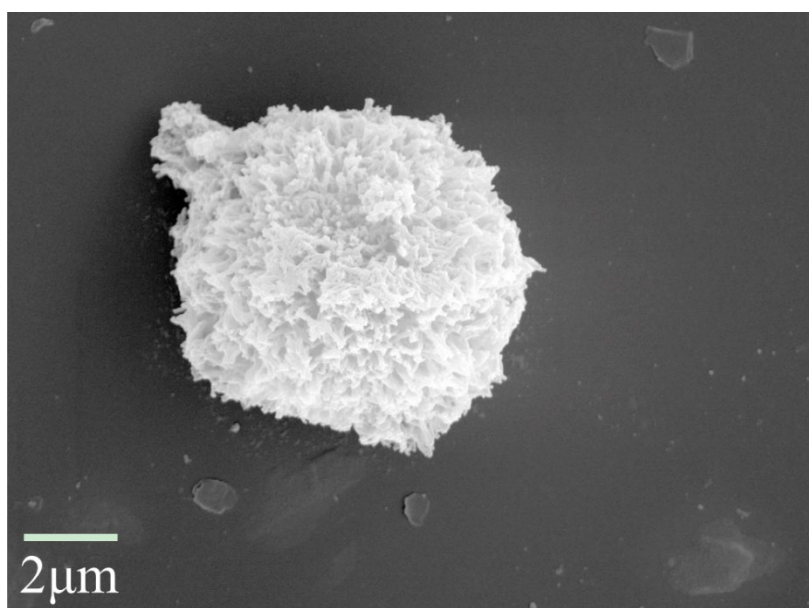

**Fig. S19** SEM image of TpMa after soaking in 5 M HNO<sub>3</sub> solution.

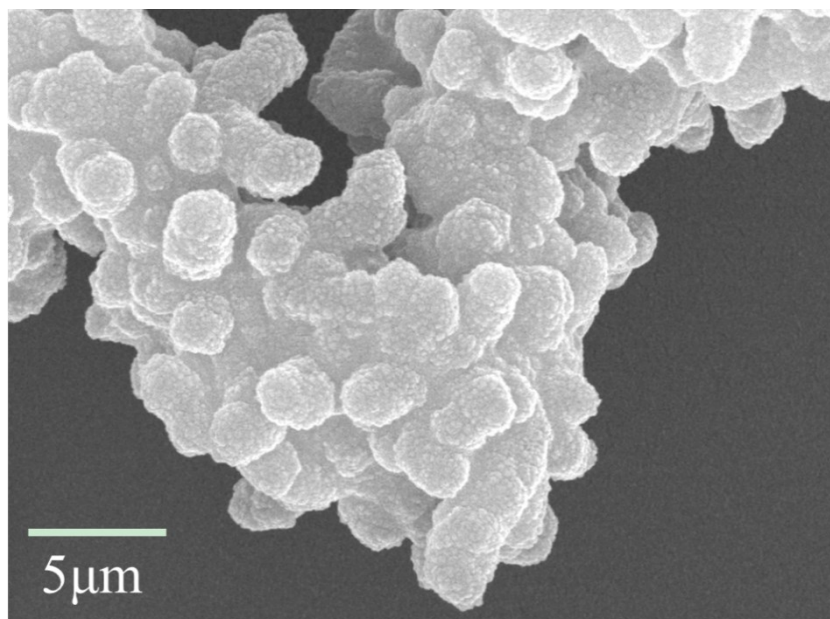

**Fig. S20** SEM image of Dp-COF after soaking in 5 M HNO<sub>3</sub> solution.

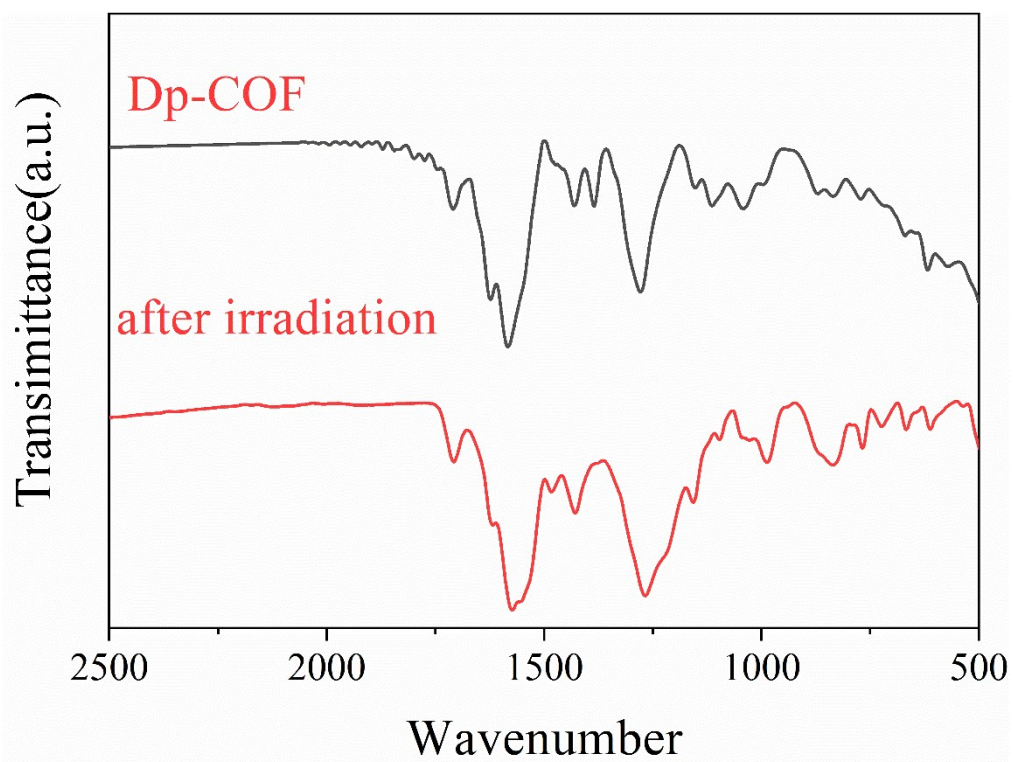

**Fig. S21** FT-IR spectra of Dp-COF and Dp-COF after 10<sup>5</sup> Gy  $\gamma$ -ray irradiation.

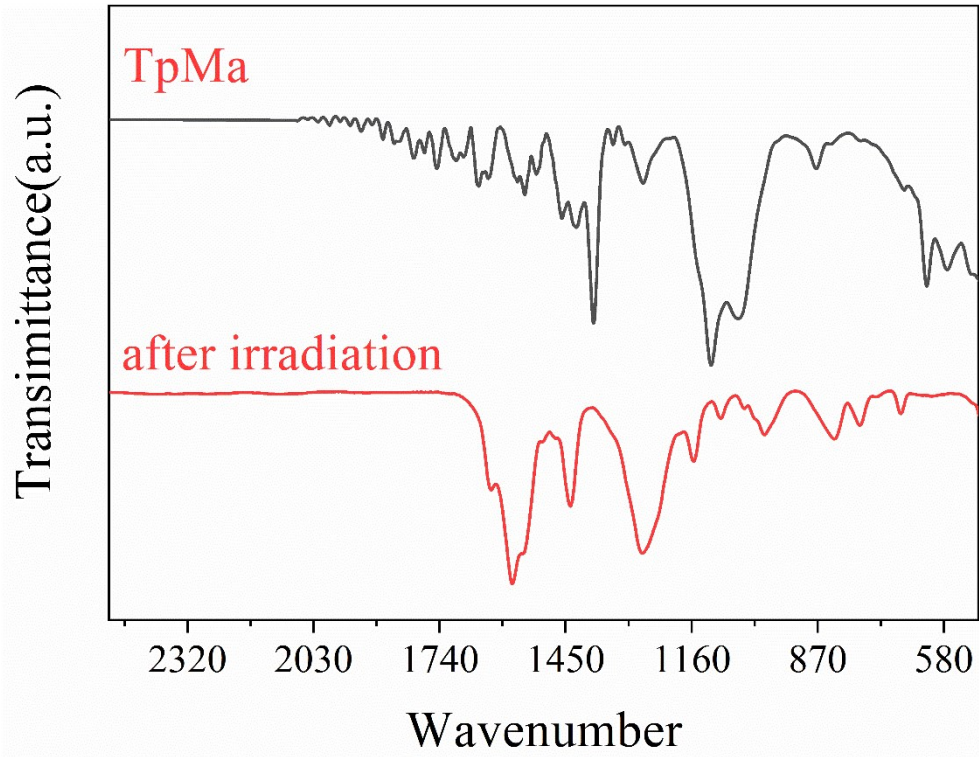

**Fig. S22** FT-IR spectra of TpMa and TpMa after  $10^5$  Gy  $\gamma$ -ray irradiation.

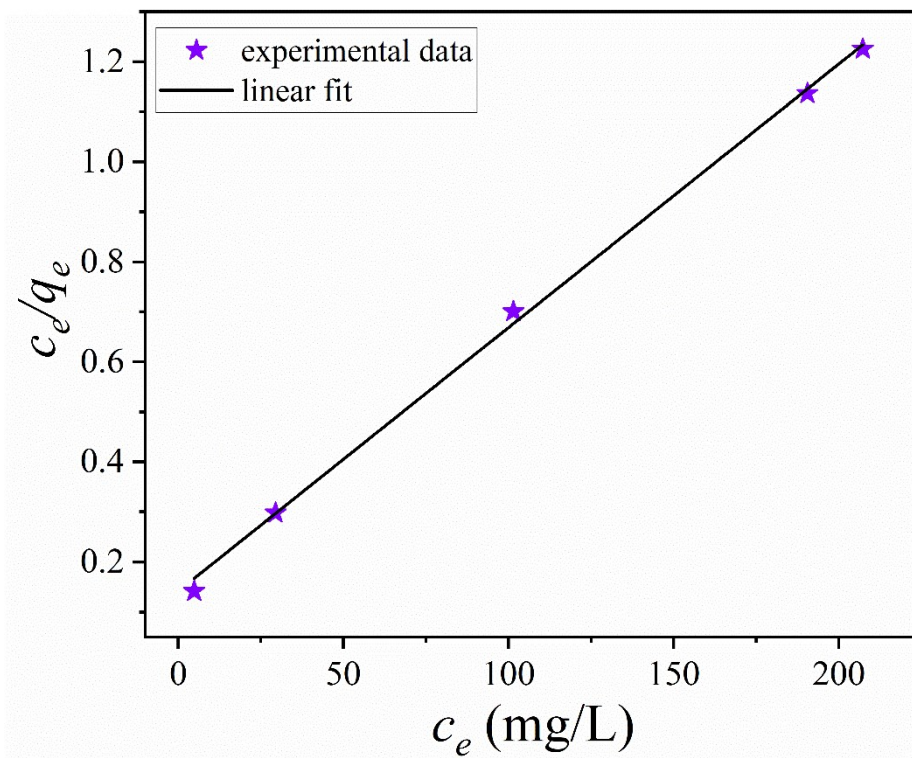

**Fig. S23** Fitting curve for Langmuir model of TpPa-1.

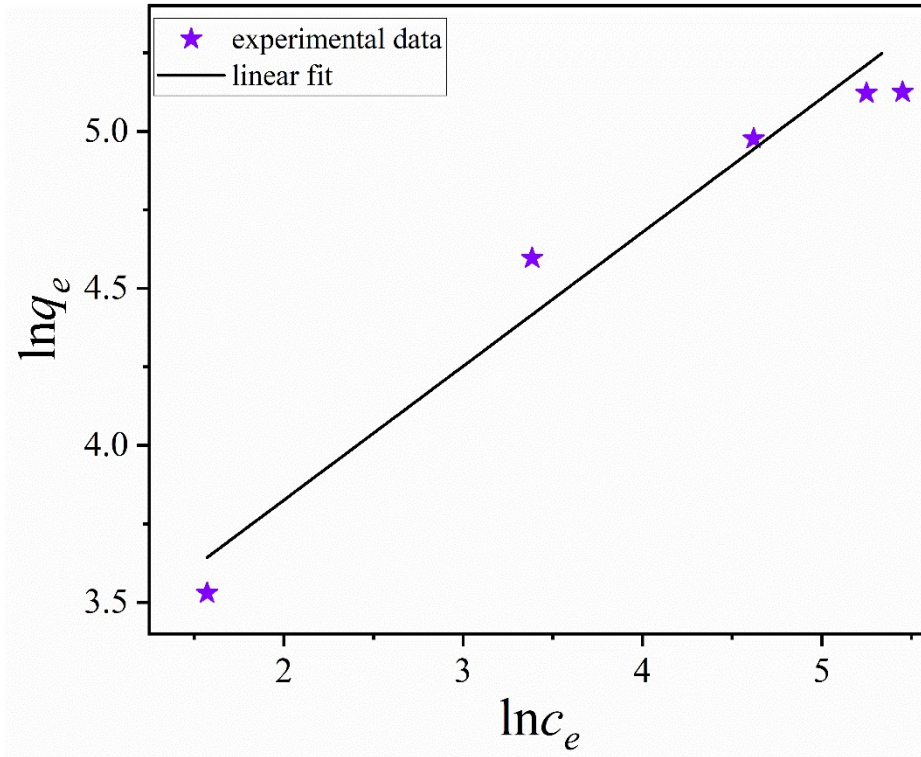

**Fig. S24** Fitting curve for Freundlich model of TpPa-1.

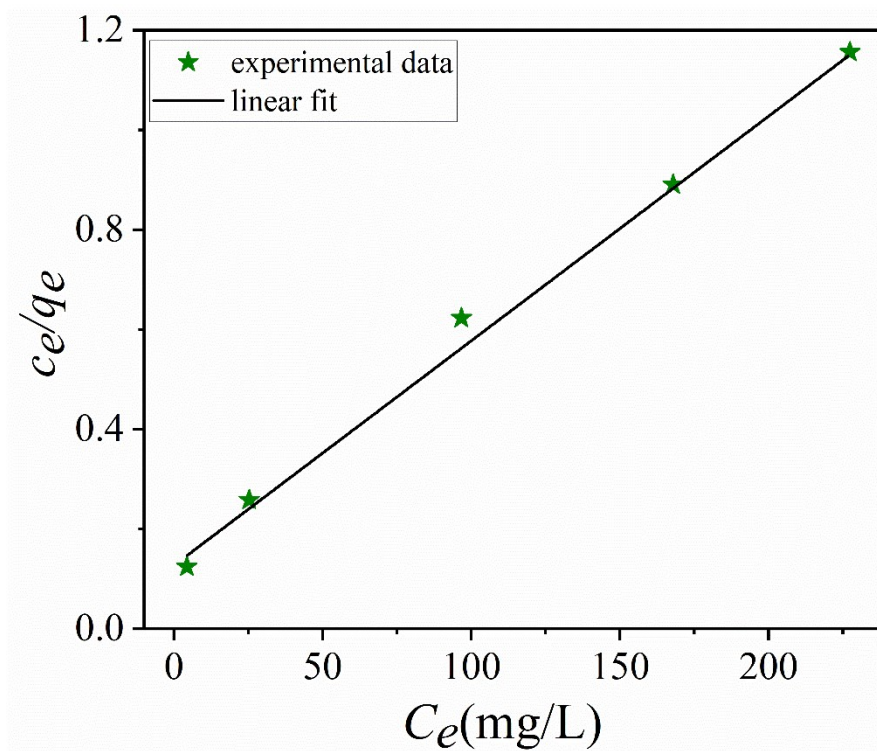

**Fig. S25** Fitting curve for Langmuir model of TpMa.

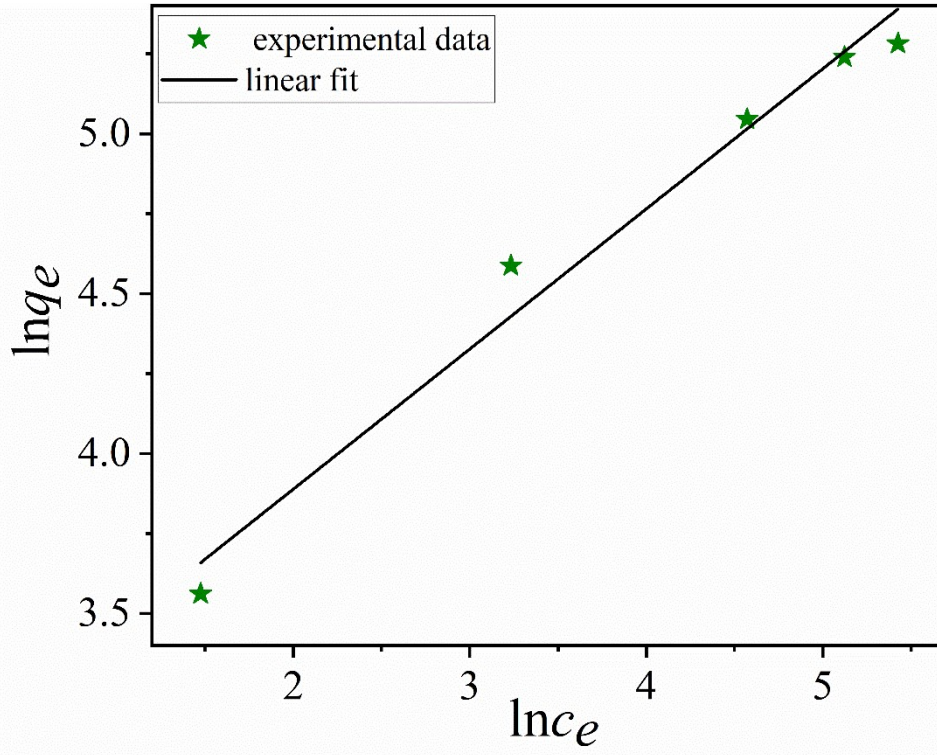

**Fig. S26** Fitting curve for Freundlich model of TpMa.

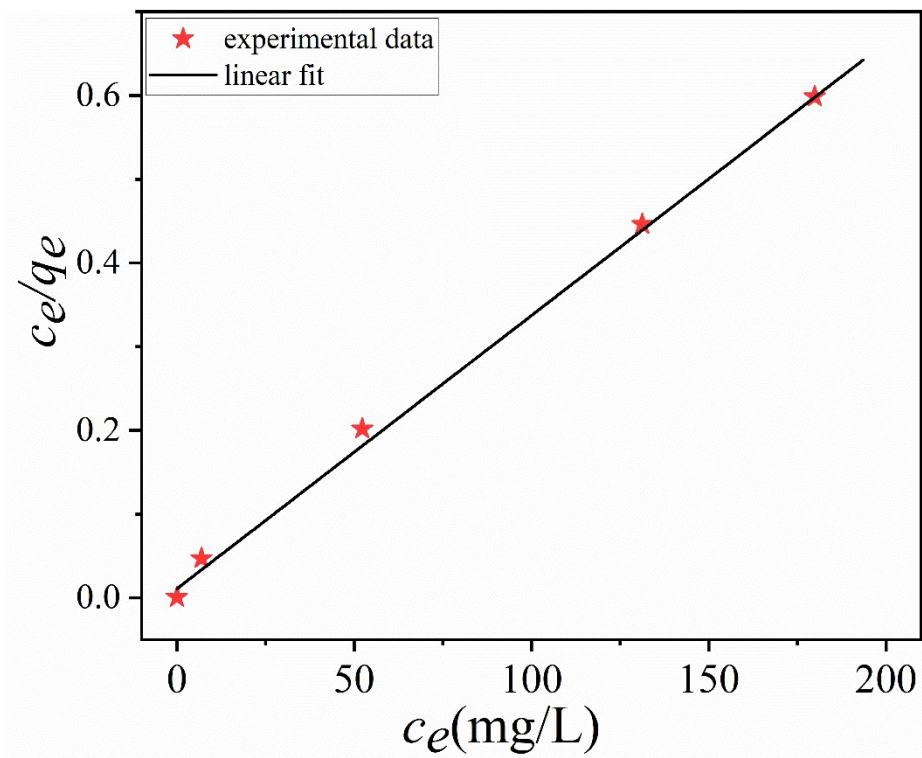

**Fig. S27** Fitting curve for Langmuir model of Dp-COF.

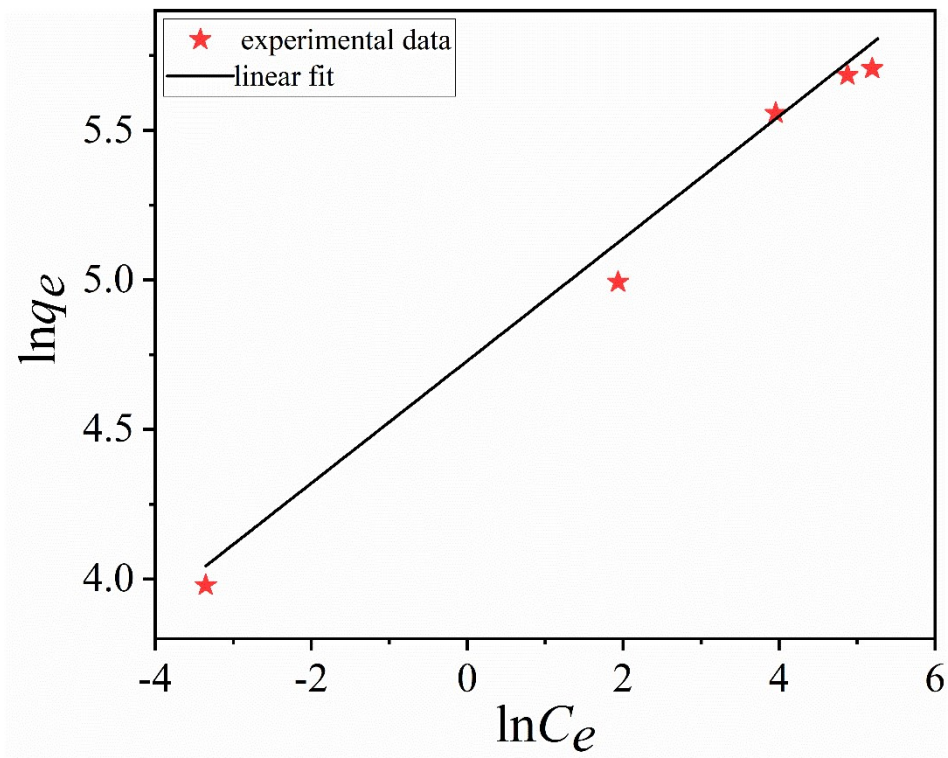

**Fig. S28** Fitting curve for Freundlich model of Dp-COF.

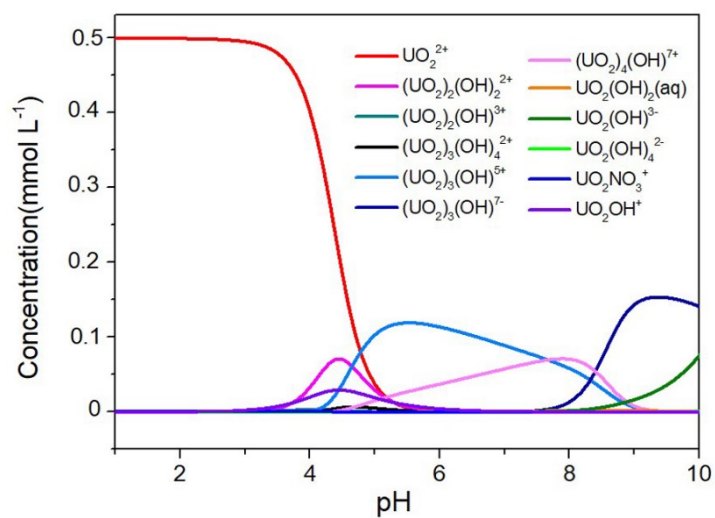

**Fig. S29** The species distribution of uranium ( $c_0 = 0.5 \text{ mmol L}^{-1}$ ,  $T = 25 \text{ }^\circ\text{C}$ ) under different pH conditions.



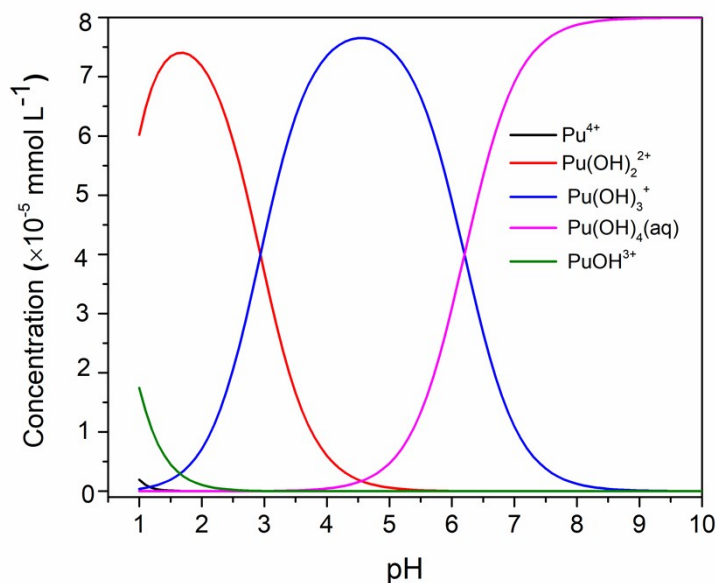

**Fig. S30** The species distribution of plutonium ( $c_0 = 8 \times 10^{-5} \text{ mmol L}^{-1}$ ,  $T = 25 \text{ }^\circ\text{C}$ ) under different pH conditions.

**Table S1.** Result of elemental analysis.

| Samples | C/wt % | H/wt % | N/wt % |
|---------|--------|--------|--------|
| TpPa-1  | 61.80  | 5.52   | 11.50  |
| TpMa    | 59.89  | 4.16   | 11.29  |
| Dp-COF  | 61.81  | 3.54   | 10.55  |

**Table S2.** Result of EDS

| Samples | C/wt % | O/wt % | N/wt % |
|---------|--------|--------|--------|
| TpPa-1  | 51.65  | 38.63  | 9.72   |
| TpMa    | 52.76  | 37.33  | 9.91   |
| Dp-COF  | 48.17  | 38.21  | 13.61  |

**Table S3.** Compositions of the simulated nuclear industrial effluent.

| Coexistent ion     | Added as                                               | Reagent purity    |
|--------------------|--------------------------------------------------------|-------------------|
| $\text{UO}_2^{2+}$ | $\text{UO}_2(\text{NO}_3)_2 \cdot 6\text{H}_2\text{O}$ | Standard reagent  |
| $\text{La}^{3+}$   | $\text{La}(\text{NO}_3)_3 \cdot 6\text{H}_2\text{O}$   | 99.9% metal basis |
| $\text{Ce}^{3+}$   | $\text{Ce}(\text{NO}_3)_3 \cdot 6\text{H}_2\text{O}$   | 99.9% metal basis |
| $\text{Nd}^{3+}$   | $\text{Nd}(\text{NO}_3)_3 \cdot 6\text{H}_2\text{O}$   | AR                |
| $\text{Sm}^{3+}$   | $\text{Sm}(\text{NO}_3)_3 \cdot 6\text{H}_2\text{O}$   | AR                |

|                  |                                                      |                   |
|------------------|------------------------------------------------------|-------------------|
| Gd <sup>3+</sup> | Gd(NO <sub>3</sub> ) <sub>3</sub> ·6H <sub>2</sub> O | AR                |
| Mn <sup>2+</sup> | MnO                                                  | 99.5%             |
| Co <sup>2+</sup> | Co(NO <sub>3</sub> ) <sub>2</sub> ·6H <sub>2</sub> O | 99.9% metal basis |
| Ni <sup>2+</sup> | Ni(NO <sub>3</sub> ) <sub>2</sub> ·6H <sub>2</sub> O | Spectrum pure     |
| Zn <sup>2+</sup> | Zn(NO <sub>3</sub> ) <sub>2</sub> ·6H <sub>2</sub> O | 99.9% metal basis |
| Ba <sup>2+</sup> | Ba(NO <sub>3</sub> ) <sub>2</sub>                    | 99.9% metal basis |

**Table S4.** Comparison of the adsorption capacities of U(VI) on Dp-COF and other reported adsorbents.

| Sorbents              | Experimental conditions | $q_{max}$ (mg/g) | Ref       |
|-----------------------|-------------------------|------------------|-----------|
| Dp-COF                | T = 298 K, pH = 4.5     | 317              | This work |
| COF-PDAN-AO           | T = 298 K, pH = 4.0     | 256              | 2         |
| COF-COOH              | T = 298 K, pH = 4.5     | 211              | 3         |
| COF-SO <sub>3</sub> H | T = 298 K, pH = 5.0     | 360              | 4         |
| <i>o</i> -GS-COF      | T = 298 K, pH = 4.5     | 144              | 5         |
| BDA-TN-AO             | T = 298 K, pH = 5.0     | 526              | 6         |

**Table S5.** Isotherm parameters for the uranium adsorption onto TpPa-1.

| isotherm model | parameter                                                       | value |
|----------------|-----------------------------------------------------------------|-------|
| Langmuir       | $q_m$ (mg/g)                                                    | 190   |
|                | $k_L$ (L/mg)                                                    | 0.037 |
|                | $R^2$                                                           | 0.997 |
|                | $n$                                                             | 2.35  |
| Freundlich     | $k_F$ (mg <sup>1-(1/n)</sup> L <sup>1/n</sup> g <sup>-1</sup> ) | 19.6  |
|                | $R^2$                                                           | 0.964 |

**Table S6.** Isotherm parameters for the uranium adsorption onto TpMa.

| isotherm model | parameter                                                       | value |
|----------------|-----------------------------------------------------------------|-------|
|                | $q_m$ (mg/g)                                                    | 222   |
| Langmuir       | $k_L$ (L/mg)                                                    | 0.035 |
|                | $R^2$                                                           | 0.998 |
|                | $n$                                                             | 2.28  |
| Freundlich     | $k_F$ (mg <sup>1-(1/n)</sup> L <sup>1/n</sup> g <sup>-1</sup> ) | 20.3  |
|                | $R^2$                                                           | 0.977 |

**Table S7.** Isotherm parameters for the uranium adsorption onto Dp-COF.

| isotherm model | parameter                                                       | value |
|----------------|-----------------------------------------------------------------|-------|
|                | $q_m$ (mg/g)                                                    | 307   |
| Langmuir       | $k_L$ (L/mg)                                                    | 0.301 |
|                | $R^2$                                                           | 0.999 |
|                | $n$                                                             | 4.89  |
| Freundlich     | $k_F$ (mg <sup>1-(1/n)</sup> L <sup>1/n</sup> g <sup>-1</sup> ) | 113.1 |
|                | $R^2$                                                           | 0.976 |

**Table S8.** Radius (r) of the cations involved in the experiments.

| ion  | Gd <sup>7</sup> | Sm <sup>7</sup> | Mn <sup>9</sup> | Ba <sup>7</sup> | Ni <sup>8</sup> | Co <sup>8</sup> | Zn <sup>8</sup> | Ce <sup>7</sup> | Nd <sup>7</sup> | La <sup>7</sup> |
|------|-----------------|-----------------|-----------------|-----------------|-----------------|-----------------|-----------------|-----------------|-----------------|-----------------|
| r(Å) | 1.34            | 1.33            | 0.83            | 1.39            | 0.69            | 0.75            | 0.74            | 1.34            | 1.34            | 1.32            |

**Table S9.** The experimental and theoretical data of the specific surface area and the total potential solvent area volume of Dp-COF and TpMa.

| Samples | specific surface area                    |                                           | The total potential solvent area volume |                                        |
|---------|------------------------------------------|-------------------------------------------|-----------------------------------------|----------------------------------------|
|         | theoretical value<br>(m <sup>2</sup> •g) | experimental<br>value (m <sup>2</sup> •g) | theoretical value(Å <sup>3</sup> )      | experimental<br>value(Å <sup>3</sup> ) |
| TpMa    | 400.94                                   | 35.26                                     | 848.09                                  | 777.35                                 |

|        |       |       |        |        |
|--------|-------|-------|--------|--------|
| Dp-COF | 94.97 | 90.18 | 599.31 | 856.38 |
|--------|-------|-------|--------|--------|

## References

1. J. H. Chong, M. Sauer, B. O. Patrick and M. J. MacLachlan, *Org. Lett.*, 2003, **5**, 3823-3826.
2. F. F. Li, W. R. Cui, W. Jiang, C. R. Zhang, R. P. Liang and J. D. Qiu, *J. Hazard. Mater.*, 2020, **392**, 122333.
3. J. Li, X. Yang, C. Bai, Y. Tian, B. Li, S. Zhang, X. Yang, S. Ding, C. Xia, X. Tan, L. Ma and S. Li, *J. Colloid Interface Sci.*, 2015, **437**, 211-218.
4. X. H. Xiong, Z. W. Yu, L. L. Gong, Y. Tao, Z. Gao, L. Wang, W. H. Yin, L. X. Yang and F. Luo, *Adv. Sci.*, 2019, **6**, 1900547.
5. R. Wen, Y. Li, M. Zhang, X. Guo, X. Li, X. Li, J. Han, S. Hu, W. Tan, L. Ma and S. Li, *J. Hazard. Mater.*, 2018, **358**, 273-285.
6. W. R. Cui, F. F. Li, R. H. Xu, C. R. Zhang, X. R. Chen, R. H. Yan, R. P. Liang and J. D. Qiu, *Angew. Chem. Int. Ed.*, 2020, **132**, 17837 – 17843.
7. F. David, V. Vokhmin and G. Ionova, *J. Mol. Liq.*, 2001, **90**, 45-62.
8. 1. R. D. Hancock and A. E. J. C. R. Martell, 1989, **89**, 1875-1914.
9. J. Luo, J. K. Liang, Q. L. Liu, F. S. Liu, Y. Zhang, B. J. Sun and G. H. Rao, *J. Appl. Phys.*, 2005, **97**, 068106.
